# Supplementary material for: Edge dislocation core structure in lamellar smectic-A liquid crystals
Source: Royal Society of Chemistry journal article supplement (doi:10.1039/b922208a), 2010-01-01
Supplement: b922208a.pdf [file b922208a.pdf]

Nasser Mohieddin Abukhdeir and Alejandro D. Rey  
 Department of Chemical Engineering, McGill University, Montréal, Québec, Canada

December 30, 2009

Supplementary Data: Critical points of the homogeneous free energy equation

The homogeneous form of the full free energy:

$$\begin{aligned}
 f - f_0 = & \frac{1}{2}a(\mathbf{Q} : \mathbf{Q}) - \frac{1}{3}b(\mathbf{Q} \cdot \mathbf{Q}) : \mathbf{Q} + \frac{1}{4}c(\mathbf{Q} : \mathbf{Q})^2 \\
 & + \frac{1}{2}\alpha|\Psi|^2 + \frac{1}{4}\beta|\Psi|^4 \\
 & - \frac{1}{2}\delta|\Psi|^2(\mathbf{Q} : \mathbf{Q}) - \frac{1}{2}e\mathbf{Q} : (\nabla\Psi)(\nabla\Psi^*) \\
 & + \frac{1}{2}l_1(\nabla\mathbf{Q})^2 + \frac{1}{2}l_2(\nabla \cdot \mathbf{Q})^2 \\
 & + \frac{1}{2}l_3\mathbf{Q} : (\nabla\mathbf{Q} : \nabla\mathbf{Q}) \\
 & + \frac{1}{2}b_1|\nabla\Psi|^2 + \frac{1}{4}b_2|\nabla^2\Psi|^2
 \end{aligned} \tag{1}$$

$$a = a_0(T - T_{NI}); \alpha = \alpha_0(T - T_{AI})$$

is derived assuming an ideal smectic-A phase where the tensorial and complex order parameters take the form:

$$\mathbf{Q} = S \left( \mathbf{x}\mathbf{x} - \frac{1}{3}\mathbf{I} \right) + \frac{1}{3}P(\mathbf{y}\mathbf{y} - \mathbf{z}\mathbf{z}) \tag{2}$$

$$\Psi = \psi e^{iqx} \tag{3}$$

where  $\mathbf{x}/\mathbf{y}/\mathbf{z}$  are the coordinate axes and  $q = \frac{2\pi}{d}$  is the magnitude of the smectic-A density wave vector. Substituting eqns. 2-3 into eqn. 1 and simplifying yields the homogeneous free energy density:

$$\begin{aligned}
 f(S, P, \psi, q, T) = & \frac{1}{3}a \left( S^2 + \frac{1}{3}P^2 \right) - \frac{2}{27}bS(S^2 - P^2) + \frac{1}{9}c \left( S^2 + \frac{1}{3}P^2 \right)^2 \\
 & + \frac{1}{2}\alpha\psi^2 + \frac{1}{4}\beta\psi^4 - \frac{1}{3}\delta\psi^2 \left( S^2 + \frac{1}{3}P^2 \right) \\
 & + \frac{1}{2}b_1\psi^2q^2 + \frac{1}{4}b_2\psi^2q^4 - \frac{1}{3}eS\psi^2q^2
 \end{aligned} \tag{4}$$

a function of four scalar order parameters and temperature. By parameterization of the homogeneous free energy (neglecting biaxiality), the critical values of eqn. 4 can be determined using the requirement of the first derivatives equaling

0:

$$\frac{\partial f}{\partial S} = \frac{12cS^3 - 6bS^2 + (4cP^2 - 18\delta\psi^2 + 18a)S + 2bP^2 - 9e\psi^2q^2}{27} \quad (5)$$

$$\frac{\partial f}{\partial P} = \frac{12cPS^2 + 12bPS + 4cP^3 + (18a - 18\delta\psi^2)P}{81} \quad (6)$$

$$\frac{\partial f}{\partial \psi} = -\frac{12\delta\psi S^2 + 12e\psi q^2 S + 4\delta\psi P^2 - 9b_2\psi q^4 - 18b_1\psi q^2 - 18\beta p^3 - 18\alpha\psi}{18} \quad (7)$$

$$\frac{\partial f}{\partial q} = -\frac{2e\psi^2qS - 3b_2\psi^2q^3 - 3b_1\psi^2q}{3} \quad (8)$$

Using the resulting equation system eqn. 5-8, critical values of the homogeneous free energy eqn. 4 can be determined by assuming the existence of different liquid crystalline states:

1. *Uniaxial nematic*:  $S \neq 0; P, \psi, q = 0$ , these assumptions result in the solution of the standard nematic equations:

$$S = \pm \frac{\sqrt{b^2 - 24ac} - b}{4c}; S = 0 \quad (9)$$

2. *Biaxial nematic*:  $S, P \neq 0; \psi, q = 0$ :

$$S = -\frac{\sqrt{b^2 - 24ac} + b}{8c}$$

$$P = \frac{\sqrt{3}\sqrt{-2S^2 - \frac{2bS}{c} - \frac{3a}{c}}}{\sqrt{2}} \quad (10)$$

3. *Uniaxial smectic-A*:  $S, \psi, q \neq 0; P = 0$ , where the roots of eqn. 11 must be numerically determined:

$$0 = 4AS^3 + 3BS^2 + 2CS + D \quad (11)$$

$$A = -(16e^4 + 96b_2\delta e^2 + 144b_2^2\delta^2 - 144b_2^2\beta c) (1296b_2^2\beta)^{-1}$$

$$B = -(-96b_1e^3 - 288b_1b_2\delta e + 96bb_2^2\beta) (1296b_2^2\beta)^{-1}$$

$$C = -((216b_1^2 - 144\alpha b_2) e^2 + (216b_1^2b_2 - 432\alpha b_2^2) \delta - 432ab_2^2\beta) (1296b_2^2\beta)^{-1}$$

$$D = -(432\alpha b_1b_2 - 216b_1^3) e (1296b_2^2\beta)^{-1}$$

$$q^2 = \frac{2eS - 3b_1}{3b_2} \quad (12)$$

$$\psi^2 = \frac{4\delta S^2 + 4eSq^2 - 3b_2q^4 - 6b_1q^2 - 6\alpha}{6\beta} \quad (13)$$

4. *Biaxial smectic-A*:  $S, P, \psi, q \neq 0$ , where the same numerical procedure as

used for the uniaxial smectic solution can be used used:

$$\begin{aligned}
 0 &= (64ce^4S^3 + 3(-96b_1ce^3 - 96bb_2\delta e^2 - 384bb_2^2de^2 + 384bb_2^2bec)S^2 \\
 &+ 2(((216b_1^2 - 144alb_2)c - 144ab_2\delta)e^2 + 288bb_1b_2\delta e + 144b^2b_2^2be)S \\
 &+ (432ab_1b_2\delta + (432\alpha b_1b_2 - 216b_1^3)c)e + (432\alpha bb_2^2 - 216bb_1^2b_2)\delta \\
 &+ 432abb_2^2\beta)/(1296b_2^2\delta^2 - 1296b_2^2\beta c) \tag{14}
 \end{aligned}$$

$$\begin{aligned}
 P^2 &= (-((4\delta e^2 + 12b_2\delta^2 - 12b_2\beta c)S^2 + (-12b_1\delta e - 12bb_2\beta)S + (9b_1^2 - 18\alpha b_2)\delta \\
 &- 18ab_2\beta))/(4b_2\delta^2 - 4b_2\beta c) \tag{15}
 \end{aligned}$$

$$\psi^2 = ((4e^2 + 12b_2\delta)S^2 - 12b_1eS + 4b_2\delta P^2 - 18\alpha b_2 + 9b_1^2)/(18b_2\beta) \tag{16}$$

$$q^2 = (2eS - 3b_1)/(3b_2) \tag{17}$$

Finally, solutions from all four states (uniaxial/biaxial nematic and uniaxial/biaxial smectic-A) must be classified and imaginary solutions discarded. Critical point values can be classified by computationally determining the Hessian matrix of eqn. 4 associated with each solution:

$$H_{ij} = \frac{\partial^2 f}{\partial i \partial j} \tag{18}$$

where  $i, j = \{S, P, \psi, q\}$  and the determinant of the Hessian matrix is used to classify the critical value.
